# Supplementary material for: Identification of potent siRNA targeting complement C5 and its robust activity in pre-clinical models of myasthenia gravis and collagen-induced arthritis
Source: PubMed Central journal article supplement — Mol Ther Nucleic Acids. 2023 Jan 13;31:339–51. doi: 10.1016/j.omtn.2023.01.005 (PMC9900455; doi:10.1016/j.omtn.2023.01.005), 2023-01-13
Supplement: mmc1.pdf [file mmc1.pdf]

**Supplemental information**

**Identification of potent siRNA targeting complement  
C5 and its robust activity in pre-clinical models of  
myasthenia gravis and collagen-induced arthritis**

**Yoshikazu Kuboi, Yuta Suzuki, Sotaro Motoi, Chiyuki Matsui, Naoki Toritsuka, Tomoya Nakatani, Kazuhiro Tahara, Yoshinori Takahashi, Yoko Ida, Ayaka Tomimatsu, Motohiro Soejima, and Toshio Imai**

## **Supporting Information**

### **Western blotting**

Serum C5 or C6 protein levels were analyzed using standard Western blotting with SDS-PAGE. Blood samples were collected under anesthesia with 2–2.5% vaporized isoflurane at week 11 (C6) and week 13 (C5) after the 1<sup>st</sup> immunization. For C5 detection, sera were diluted 1:200 into PBS and mixed with NuPAGE™ LDS Sample Buffer (#NP0007, Invitrogen), proteins were separated through electrophoresis on NuPAGE Novex Bis-Tris pre-cast 10% gels (# 567-1035, Bio-Rad Laboratories, Hercules, CA, USA). After electrophoretic transfer onto iBLOT2 PVDF Regular Stacks (IB24001, Thermo Fisher Scientific) using a iBlot2 Gel Transfer Device (IB21001, Thermo Fisher Scientific), membranes were blocked with blocking buffer (5% skim milk in Tris-buffered saline containing 0.1% Tween20 (TBS-T)) and incubated overnight at 4 °C with 1:1000 diluted Mouse Complement Component C5a Antibody (#AF2150, R&D Systems). Subsequently, 1:1000 diluted Rabbit anti-Goat IgG (H + L) Secondary Antibody-HRP (#811620, Invitrogen) was used. The immunoblotting signal was developed using the ECL Prime Western Blotting Detection Reagents (#RPN2232, cytiva), followed by imaging with the LAS3000 mini (FUJIFILM). For C6 detection, sera were diluted 1:50 into PBS and mixed with Laemmli Sample Buffer (#1610737, Bio-Rad), proteins were separated through electrophoresis on 4–20% Criterion TGX Precast Gels (#567-1095, Bio-Rad). After electrophoretic transfer onto iBLOT2 PVDF Regular Stacks (Invitrogen), membranes were blocked with the blocking buffer described above and incubated overnight at 4 °C with 1:2000 diluted C6 Polyclonal antibody (#17239-1-AP, Proteintech). Subsequently, 1:5000 diluted Peroxidase AffiniPure F(ab')<sub>2</sub> Fragment Donkey Anti-Rabbit IgG (H + L)(#711-036-152, Jackson ImmunoResearch) secondary antibody was used. The immunoblotting signal was developed and detected as described above.

**Table S1. siRNA sequences**

| siRNA                      | Sense (5'-3')                       | Antisense (5'-3')                   |
|----------------------------|-------------------------------------|-------------------------------------|
| Control siRNA (Luciferase) | cuuAcGcuGAGuAcuucGAt <sup>^</sup> t | UCGAAGuACUcAGCGuAAGt <sup>^</sup> t |
| m/rC5-siRNA                | cuGuGAAAGcAAGAuAuuuuu               | AAAuAUCUUGCUUcAcAGuu                |
| m/rC6-siRNA                | uGuucuAAGuccuGcAAuuuu               | AAUUGcAGGACUuAGAAcAuu               |

N, RNA; n, 2'-OMe RNA; t, DNA(T); <sup>^</sup>, phosphorothioate; m/r, mouse-rat.

Other C5-siRNA sequences can be identified using the indicated position of NM\_001735.2.

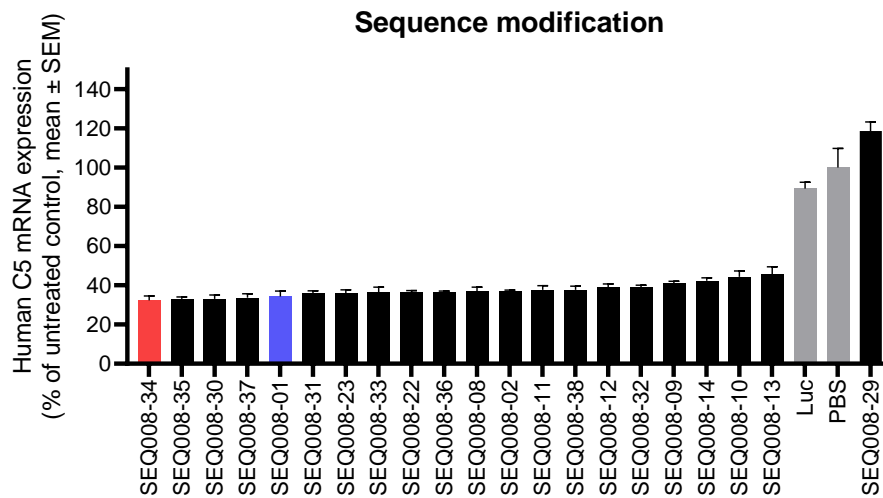

**Figure S1. *In vitro* screening of chemically or structurally modified C5-siRNA.** Human C5 mRNA levels in Hep3B cells transfected with a panel of siRNAs (1 nM) overnight were quantified using RT-qPCR and normalized to the housekeeping gene GAPDH. Data are presented as mean ± SEM.

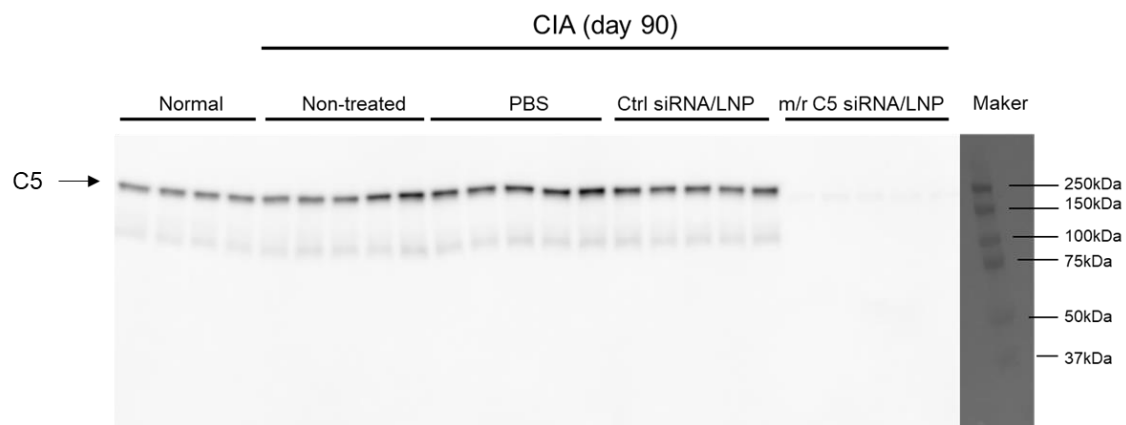

**Figure S2. Western blot analysis for complement C5 protein expression levels in serum.** Complement C5 levels in the serum of mice treated with either PBS, 1 mg/kg of Ctrl siRNA/LNP, 1 mg/kg of m/rC5-siRNA/LNP, or that of normal mice were evaluated. Full scan of western blots is shown.

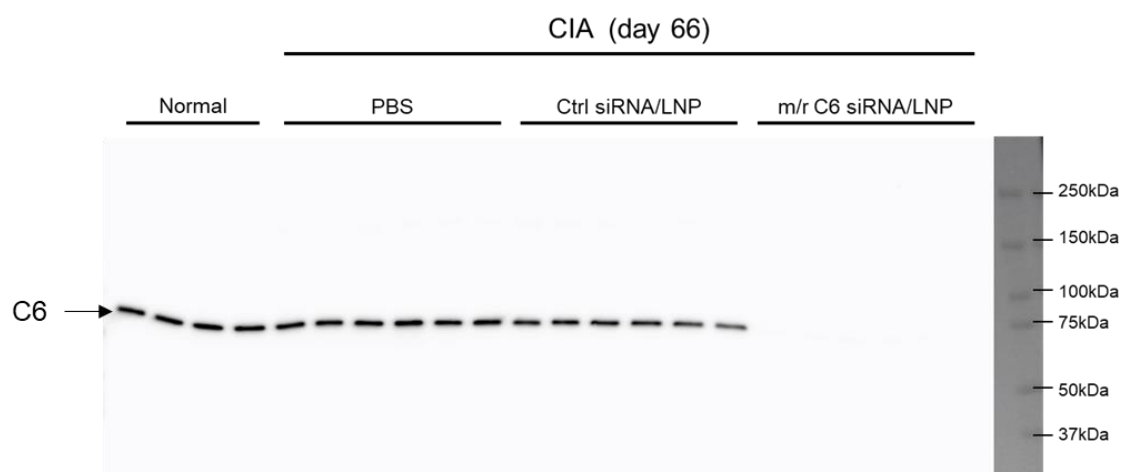

**Figure S3. Western blot analysis for complement C6 protein expression levels in serum.** Complement C6 levels in plasma of mice treated with either PBS, 1 mg/kg of Ctrl siRNA/LNP, 1 mg/kg of m/rC6-siRNA/LNP, or that of normal mice were evaluated. Full scan of western blots is shown.
